# Supplementary material for: Effects of Graphene Oxide Nanosheets in Freshwater Biofilms
Source: MDPI journal article supplement (doi:10.3390/molecules28124577), 2023-06-06
Supplement: s1 [file s1]

**Supplementary Table S2** – Comparative table of the effects of GO published against our results. Alterations in photosynthetic pigments (chlorophyll a, b and c, carotenoids and fucoxanthin), cell metabolism (lipid content and intracellular carbohydrates), antioxidant and biotransformation activity (SOD and GSTs) and cellular damage (reactive oxygen species, lipid peroxidation and protein carbonylation).

| Parameter                   | Effect          | Organism                                                                                                                                          | [GO]                   | Reference            |
|-----------------------------|-----------------|---------------------------------------------------------------------------------------------------------------------------------------------------|------------------------|----------------------|
| Chlorophyll a               | Decrease        | <i>Chlorella vulgaris</i> , <i>Scenedesmus obliquus</i>                                                                                           | 10 mg/L                | [24], [26]           |
|                             | Increase        | <i>Chlamydomonas reinhardtii</i> , <i>Cyclotella</i> sp                                                                                           |                        | [24]                 |
|                             | Decrease        | <i>Myrocystis aeruginosa</i>                                                                                                                      | 20 mg/L                | [25], [16]           |
|                             | Increase        | <b>Fluvial biofilm</b>                                                                                                                            | <b>10, 20 mg/L</b>     | <b>Present study</b> |
| Chlorophyll b               | <b>Increase</b> | <b>Fluvial biofilm</b>                                                                                                                            | <b>10, 20 mg/L</b>     | <b>Present study</b> |
| Chlorophyll c               | <b>Increase</b> | <b>Fluvial biofilm</b>                                                                                                                            | <b>10, 20 mg/L</b>     | <b>Present study</b> |
| Carotenoids                 | <b>Increase</b> | <b>Fluvial biofilm</b>                                                                                                                            | <b>10 mg/L</b>         | <b>Present study</b> |
| Fucoxanthin                 | <b>Increase</b> | <b>Fluvial biofilm</b>                                                                                                                            | <b>20 mg/L</b>         | <b>Present study</b> |
| Lipid content               | <b>Increase</b> | <b>Fluvial biofilm</b>                                                                                                                            | <b>10, 20 mg/L</b>     | <b>Present study</b> |
| Intracellular carbohydrates | <b>Increase</b> | <b>Fluvial biofilm</b>                                                                                                                            | <b>0.1, 1, 10 mg/L</b> | <b>Present study</b> |
| SOD activity                | Increase        | <i>Chlorella vulgaris</i> , <i>Scenedesmus obliquus</i> , <i>Microcystis aeruginosa</i> , <i>Chlamydomonas reinhardtii</i> , <i>Cyclotella</i> sp | 10 mg/L                | [24]                 |
|                             | <b>Increase</b> | <b>Fluvial biofilm</b>                                                                                                                            | <b>10, 20 mg/L</b>     | <b>Present study</b> |
| GSTs activity               | <b>Increase</b> | <b>Fluvial biofilm</b>                                                                                                                            | <b>10, 20 mg/L</b>     | <b>Present study</b> |
| ROS                         | Increase        | <i>Chlorella vulgaris</i> , <i>Scenedesmus obliquus</i> , <i>Chlamydomonas reinhardtii</i> , <i>Cyclotella</i> sp                                 | 10 mg/L                | [24]                 |
|                             | Increase        | <i>Myrocystis aeruginosa</i>                                                                                                                      | 10, 20 mg/L            | [24], [25]           |
|                             | Increase        | <i>Chlorella</i> sp.                                                                                                                              | 10, 20 mg/L            | [38]                 |
| Lipid peroxidation          | <b>Decrease</b> | <b>Fluvial biofilm</b>                                                                                                                            | <b>10, 20 mg/L</b>     | <b>Present study</b> |
|                             |                 |                                                                                                                                                   |                        |                      |
| Protein carbonylation       | <b>Increase</b> | <b>Fluvial biofilm</b>                                                                                                                            | <b>10 mg/L</b>         | <b>Present study</b> |
